# Supplementary material for: Alternative Performance Measures for Prediction Models
Source: PubMed Central journal article supplement (PMC3946724; doi:10.1371/journal.pone.0091249), 2014-03-07

Exhibit S1. Simulation when a strong continuous-scale marker is added to the prediction model.

Three variables are assumed to be predictive of a particular disease ( $D$ ): the baseline score ( $S$ ) and two new markers ( $M_3$  and  $M_4$ ).  $S$  is the same composite baseline variable as in the text, whereas the new markers now are assumed to be continuous (normally distributed). In order to acknowledge a correlation between  $S$  and the two new markers, let the mean of  $M_3$  and  $M_4$  be 3.65 and 0.05 respectively when  $S$  is above average ( $S > 0$ ), and 3.55 and -0.05, when otherwise. The standard deviations of both  $M_3$  and  $M_4$  are assumed to be 1.

It is assumed that the discrimination power of  $M_3$  is independent of the baseline score, whereas the discrimination power of  $M_4$  is not uniform, but is concentrated in the gray zone of the baseline model (where the predicted probability using the baseline model is close to the *a priori* probability). Specifically, the disease risk is assumed to follow a logistic model, as below:

$$\text{logit } \Pr(D = 1 | B, M_3, M_4) = -3 + 2 \times B + 0.8 \times M_3 + 2.2 \times K(B) \times M_4,$$

where  $K(x)$  is a Gaussian kernel function centered at 0:  $K(x) = \exp(-x^2/0.0833)$ . In this model, the disease odds ratio per unit increase in the baseline score is  $\exp(2) = 7.4$  (the same as in the text). The disease odds ratio per unit increase in  $M_3$  is  $\exp(0.8) = 2.2$  irrespective of the baseline score. The disease odds ratio per unit increase in  $M_4$  reaches a peak [ $\exp(2.2) = 9.0$ ] when the baseline score is at its average value ( $S = 0$ ), and rapidly decays when the baseline score is above or below

average:

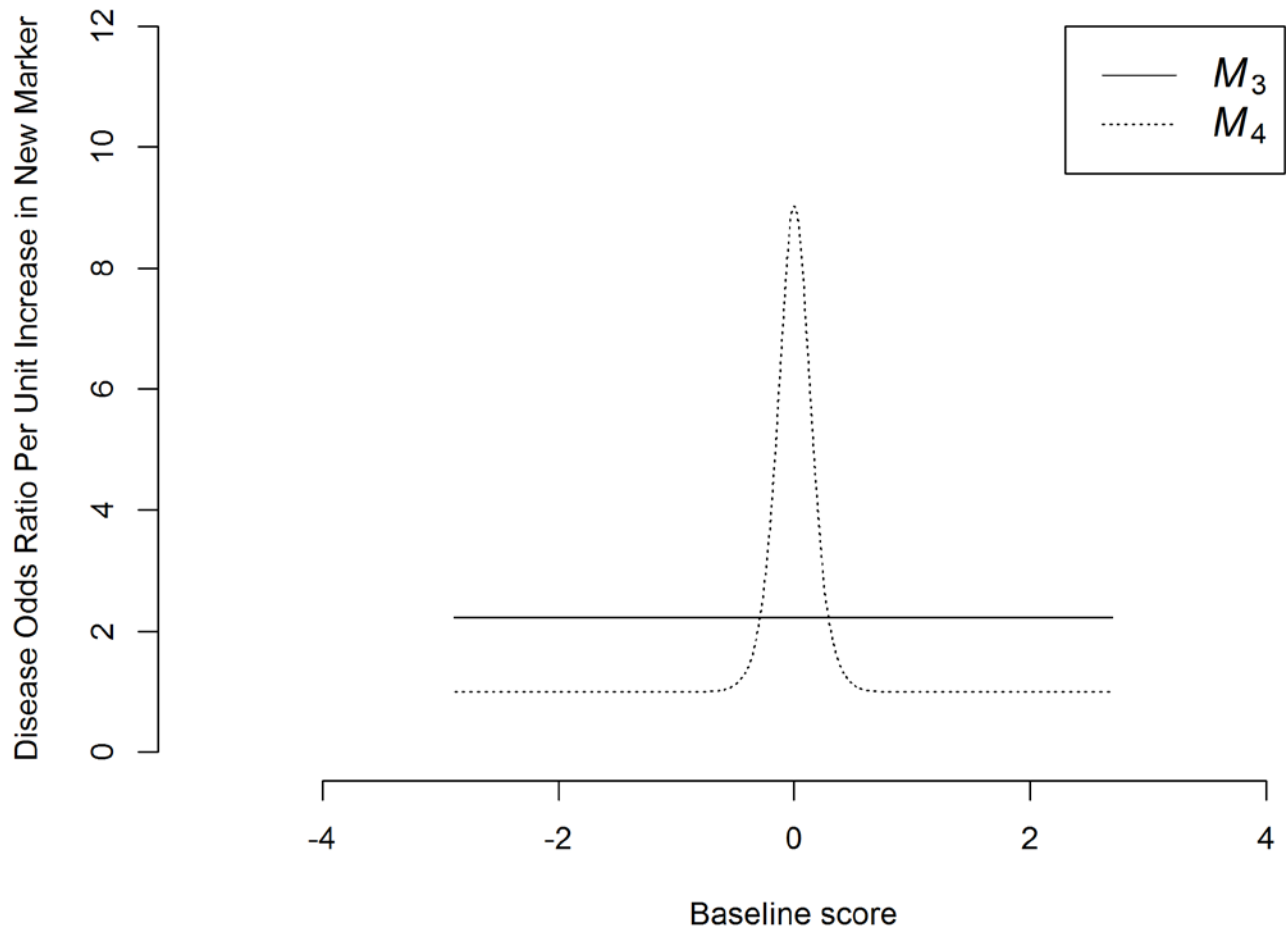

A total of 500 subjects were simulated as the training sample, and another 500 subjects were simulated as the validation sample. The performances of three prediction models were compared (see below): (I) the model with the baseline score only, (II) the model with the baseline score plus  $M_3$  and (III) the model with the baseline score plus  $M_4$ . A total of 10000 simulations were performed.

|                                        | Performance Measure |                |                 |                 |
|----------------------------------------|---------------------|----------------|-----------------|-----------------|
|                                        | AUC                 | Gini           | Pietra          | sBrier          |
| <b>Model</b>                           |                     |                |                 |                 |
| $B$                                    | 0.848               | 0.696          | 0.531           | 0.364           |
| $B + M_3$                              | 0.872               | 0.744          | 0.577           | 0.419           |
| $B + M_4$                              | 0.874               | 0.749          | 0.611           | 0.433           |
| <b>Absolute (Relative) Improvement</b> |                     |                |                 |                 |
| from $B$ to $B + M_3$                  | +0.024 (+2.8%)      | +0.048 (+6.9%) | +0.046 (+8.7%)  | +0.055 (+15.1%) |
| from $B$ to $B + M_4$                  | +0.026 (+3.1%)      | +0.053 (+7.6%) | +0.080 (+15.1%) | +0.069 (+19.0%) |

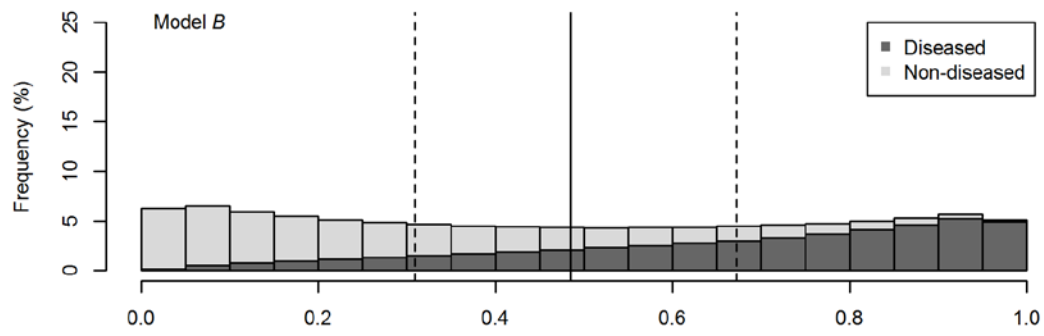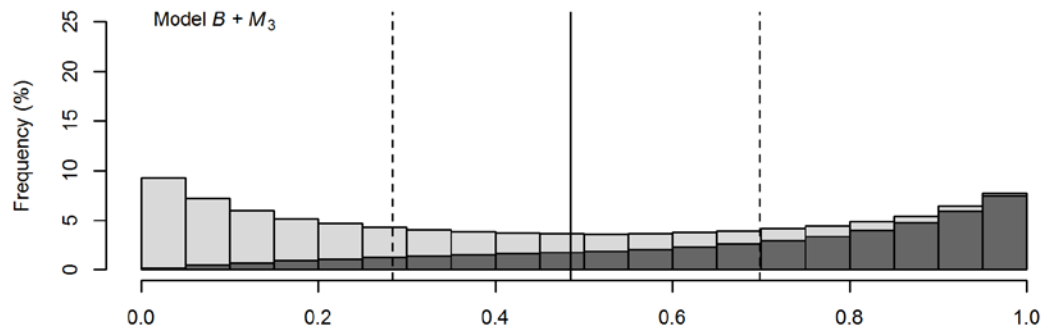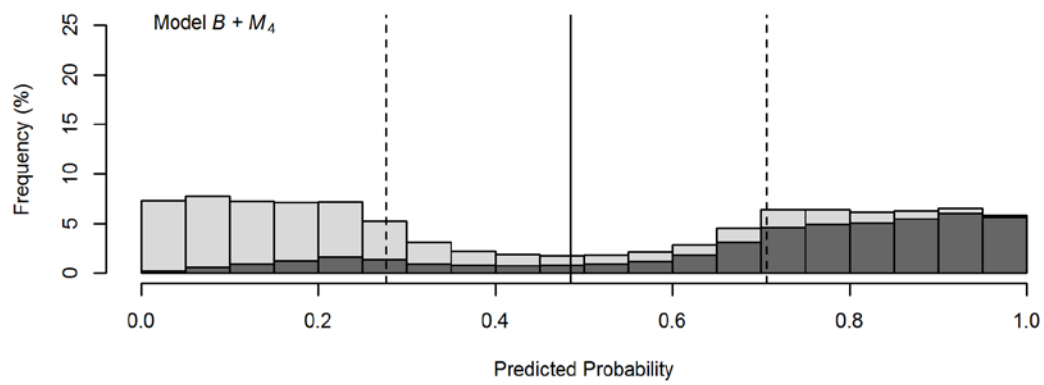

Supplement: pone.0091249.s001.pdf [file pone.0091249.s001.pdf]
